# Supplementary material for: Bacterial Aspiration Pneumonia in Generalized Convulsive Status Epilepticus: Incidence, Associated Factors and Outcome
Source: MDPI journal article supplement (doi:10.3390/jcm11226673), 2022-11-10
Supplement: s1 [file s1]

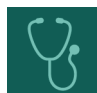

**Table S1.** Comparison of patients with BAP according to amoxicillin/clavulanic acid susceptibility among causative pathogens.

| Characteristics                            | BAP (n=54)                                      |                                               | p value       |
|--------------------------------------------|-------------------------------------------------|-----------------------------------------------|---------------|
|                                            | ≥1 micro-organism non-susceptible to ACA (n=13) | All micro-organisms susceptible to ACA (n=41) |               |
| Demographics                               |                                                 |                                               |               |
| Age (years)                                | 64 (42-67)                                      | 55 (43-64)                                    | 0.728         |
| Male sex                                   | 8 (62)                                          | 29 (71)                                       | 0.733*        |
| mRS score 0-1                              | 4 (31)                                          | 22 (54)                                       | 0.150         |
| SAPS II (without age)                      | 57 (26-64)                                      | 51 (40-56)                                    | 0.857         |
| Immunosuppression                          | 2 (15)                                          | 0 (0)                                         | 0.055*        |
| Colonization with ESBL-producing bacterium | 4 (31)                                          | 1 (2)                                         | <b>0.010*</b> |
| Antibiotics before ICU admission           | 4 (31)                                          | 0 (0)                                         | <b>0.002*</b> |
| Outcomes                                   |                                                 |                                               |               |
| Mechanical ventilation duration (days)     | 2.06 (1.71-16.38)                               | 4.04 (1.71-7.79)                              | 0.838         |
| ICU stay length (days)                     | 6.67 (5.67-16.71)                               | 7.00 (4.04-11.60)                             | 0.413         |
| ICU mortality                              | 1 (8)                                           | 5 (12)                                        | 1.000*        |
| 3-month poor functional outcome            | 5 (38)                                          | 19 (50)                                       | 0.472         |
| 3-month mortality                          | 2 (15)                                          | 7 (18)                                        | 1.000*        |

Categorical variables were expressed as number (percentage) and compared by a Chi-squared test or Fisher's exact test when specified by \*. Continuous variables were expressed as median (inter-quartile range) and *t*-test was performed (Welch or Wilcoxon tests, as appropriate).

Missing values (non-susceptible to ACA; susceptible to ACA): 3-month outcomes, 4 (0;3).

Abbreviations: BAP, bacterial aspiration pneumonia; ACA, amoxicillin-clavulanic acid; ICU, intensive care unit.
